# Supplementary material
Source: PubMed Central journal article supplement (PMC9235507)
Supplement: NIHMS1809450-supplement-Supplemental_Figures.pdf [file NIHMS1809450-supplement-Supplemental_Figures.pdf]

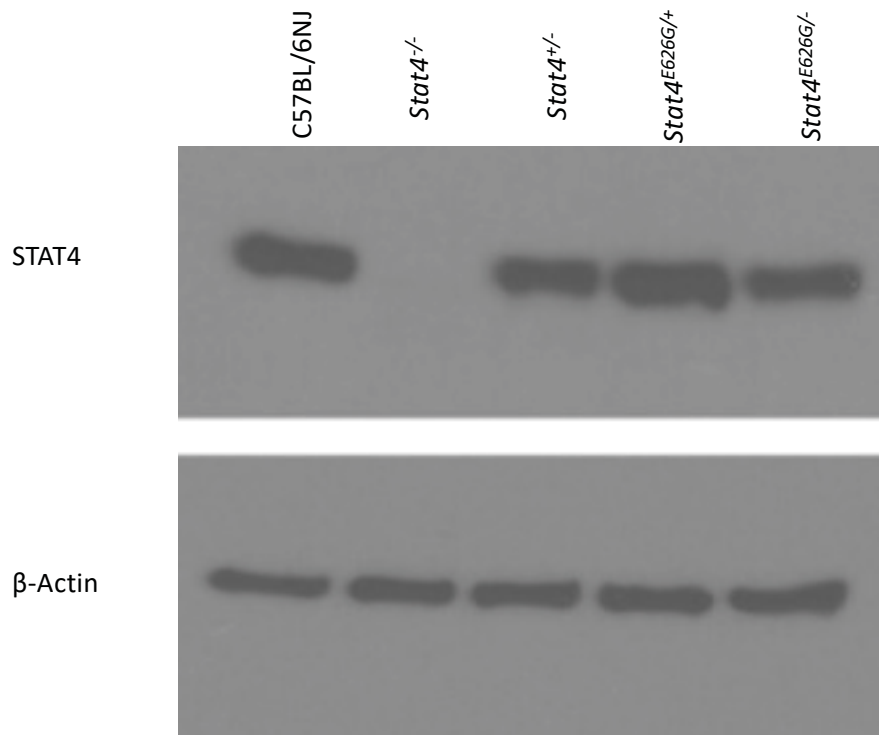

**Fig S1** Splenocytes were isolated from C57Bl/6NJ, *Stat4*<sup>-/-</sup>, *Stat4*<sup>+/-</sup>, *Stat4*<sup>E626G/+</sup>, and *Stat4*<sup>E626G/-</sup> mice and treated with 1ug/ml PMA and 50ng/ml IL-12 for 20 minutes. Splenocytes were lysed and total protein was immunoblotted for the presence of STAT4 and Actin.

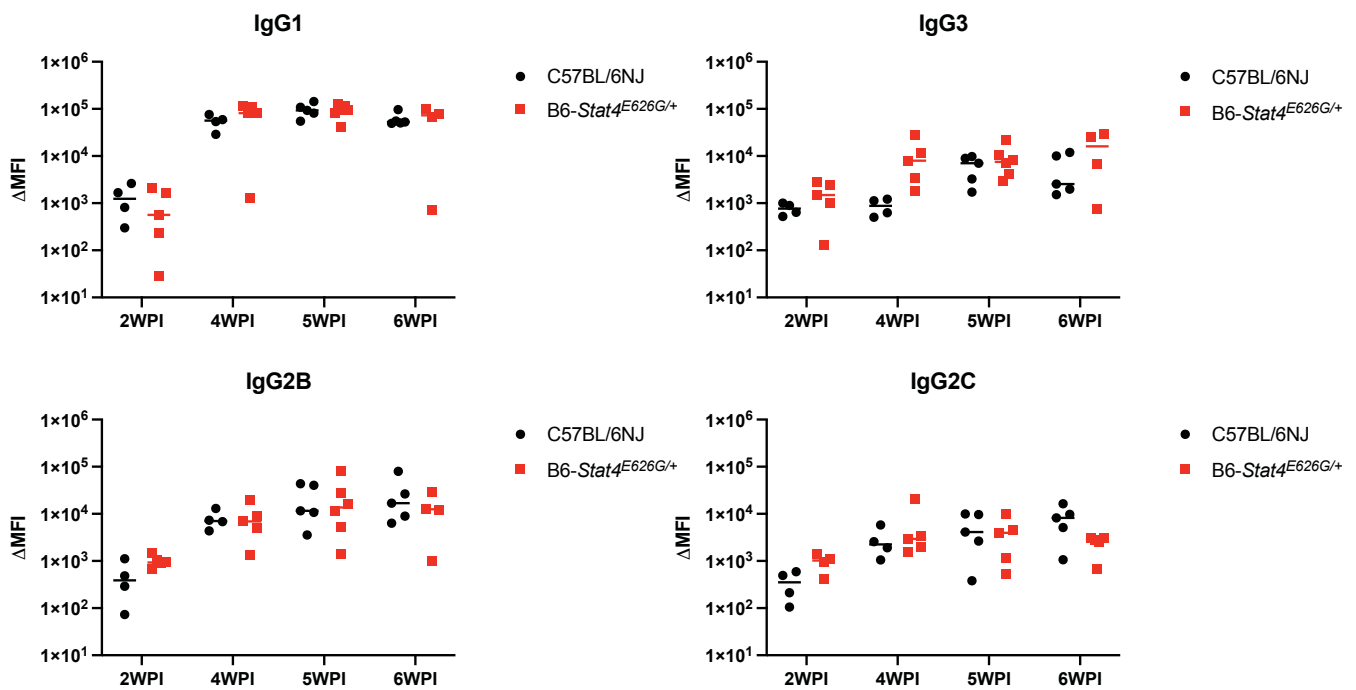

**Fig. S2.** *Stat4*<sup>E626G/+</sup> and WT mice have similar serum antibodies after Cp1038 infection. C57BL/6NJ (black circles), B6-*Stat4*<sup>E626G/+</sup> (red squares) mice were intranasally infected with Cp1038. At the indicated time points mice were sacrificed (N=4-5/time point) and *Coccidioides* specific antibodies were measured by FLISA. Data is expressed as increase in MFI compared to naïve serum. No significant difference was determined using a Mann-Whitney on log transformed data.

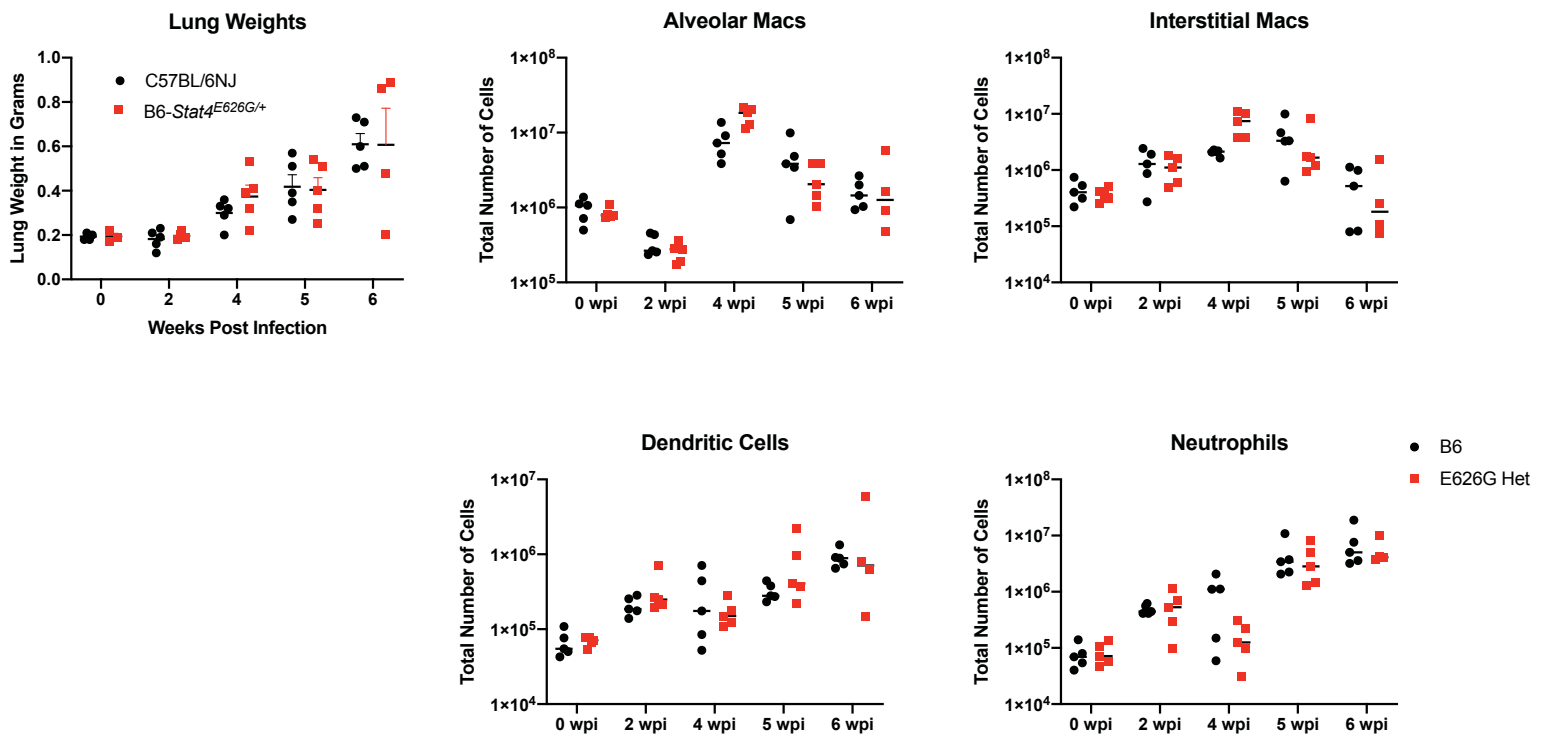

**Fig. S3.** *Stat4*<sup>E626G/+</sup> and WT mice have similar innate cell and weight accumulation in the lungs after Cp1038 infection. C57BL/6NJ (black circles), B6-*Stat4*<sup>E626G/+</sup> (red squares) mice were intranasally infected with Cp1038. At the indicated time points mice were sacrificed (N=4-5/time point) and total lung weight as well as numbers of innate cells were determined in the lungs by flow cytometry. No significance was determined by Mann-Whitney on log transformed data. Data is representative of 2 experiments of similar design.
