# Supplementary material
Source: PubMed Central journal article supplement (PMC9235507)
Supplement: NIHMS1809450-supplement-Supplemental_Table.pdf [file NIHMS1809450-supplement-Supplemental_Table.pdf]

|          | score | sequence                          |
|----------|-------|-----------------------------------|
| Guide #1 | 71    | TGTTGTAGG<br>GTTCTACAG<br>AGTGG R |
| Guide #2 | 70    | TCTGTAGAA<br>CCCTACAAC<br>AAAGG F |
| Guide #3 | 71    | GACAGTCTC<br>CCTTTGTTG<br>TAGGG R |
| Guide #4 | 69    | CGACAGTCT<br>CCCTTTGTT<br>GTAGG R |
| Guide #5 | 67    | CTACAACAA<br>AGGGAGACT<br>GTCCG F |

The successful guide is highlighted in yellow.

Oligoes:

Stat4\_oligo3

Tgcatggaccattcgaggagcctaaatattccagtttctgtgcttcaggagaagtgagattccactctgtaggaccgtacaataagggcaggctgtc

Stat4\_oligo3n

tttcagGAGAAGTGAGATTCCACTCTGTAGGACCGTACAACAAAGGGAGACTGTCCGGCTCTGCCG

RsaI

ggctctgccgttcgctgacatcctgagactacaaggttatcatggctgaaaacatccctgaaaaccctt
